# Supplementary material
Source: PubMed Central journal article supplement (PMC3000492)
Supplement: mmc1.pdf [file mmc1.pdf]

## Supporting Material

### Title: Single-Molecule Adhesion Forces and Attachment Lifetimes of Myosin-I

Authors: Serapion Pyrpasopoulos, Henry Shuman, and E Michael Ostap

### Supplementary Tables

**Table S1:** Number of contact cycles and interactions for ramp-force data.

| Loading Rate (pN/s)                                   | # Cycles | # Single-Peak Events |
|-------------------------------------------------------|----------|----------------------|
| 2%PtIns(4,5)P <sub>2</sub> & myo1c <sup>IQ-tail</sup> |          |                      |
| 250 ± 29                                              | 8235     | 162 (2.0%)           |
| 930 ± 120                                             | 38106    | 340 (0.9%)           |
| 1800 ± 230                                            | 67134    | 945 (1.4%)           |
| Lipid extraction                                      |          |                      |
| 1100 ± 130                                            | 5115     | 236 (4.6%)           |

**Table S2:** Number of contact cycles and interactions for constant force data

| Uncorrected Data<br>(2%PtIns(4,5)P <sub>2</sub> & myo1c <sup>IQ-tail</sup> ) | Control Data<br>(2%PtIns(4,5)P <sub>2</sub> & No myo1c <sup>IQ-tail</sup> ) |
|------------------------------------------------------------------------------|-----------------------------------------------------------------------------|
|------------------------------------------------------------------------------|-----------------------------------------------------------------------------|

| Force (pN) | # Cycles | # Attachments | # Cycles | # Attachments | % Specific Attachments |
|------------|----------|---------------|----------|---------------|------------------------|
| 0.3        | 6417     | 1172 (18%)    | 7023     | 574 (8.2%)    | 9.8%                   |
| 0.9        | 5453     | 613 (11%)     | 3140     | 162 (5.2%)    | 5.8%                   |
| 1.7        | 7231     | 635 (8.8%)    | 4005     | 26 (0.65%)    | 8.2%                   |
| 2.5        | 19018    | 1735 (9.1%)   | 12716    | 117 (0.92%)   | 8.2%                   |

## **Supplementary Figure Legends**

### **Fig. S1**

Diagram of experimental step-up used to measure the interaction of pedestal-attached myo1c<sup>IQ-tail</sup> with membrane-coated beads held in an optical trap. The trap position was oscillated, resulting in the compression of the trapped beads against myo1c<sup>IQ-tail</sup>-coated pedestals, followed by retraction. Adhesion forces displace the bead from the trap center during retraction, which is measured as a beam deflection at the back focal plane with a quadrant detector. Formation and subsequent rupture of bonds appeared as negative peaks in the data traces (Fig. 1). Myo1c<sup>IQ-tail</sup> molecules were site-specifically attached to pedestals via neutravidin-biotin linkages. Beads and protein molecules are not drawn to scale.

### **Fig. S2**

Frequency distributions of non-specific interactions per oscillation cycle for three control experiments at loading rate of 1840 pN/s: (white bars) 100% DOPC coated beads interacting with pedestals decorated with myo1c<sup>IQ-tail</sup>, (hatched bars) 2% PtdIns(4,5)P<sub>2</sub>-98%DOPC coated beads interacting with pedestals in the absence of myo1c<sup>IQ-tail</sup> and (grey bars) 2% PtdIns(4,5)P<sub>2</sub>-98%DOPC coated beads interacting with pedestals decorated with myo1c<sup>IQ-tail</sup> in the presence of 100 μM InsP<sub>6</sub>.

### **Fig. S3**

Frequency distributions of attachment-durations under acquired under constant forces between beads coated with 2% PtdIns(4,5)P<sub>2</sub> - 98% DOPC and pedestals decorated with (●) myo1c<sup>IQ-tail</sup> or (Δ) in the absence of myo1c<sup>IQ-tail</sup>. Frequencies were calculated over the total number of contacts between the trapped bead and the pedestals. The constant pulling force is indicated in each plot.

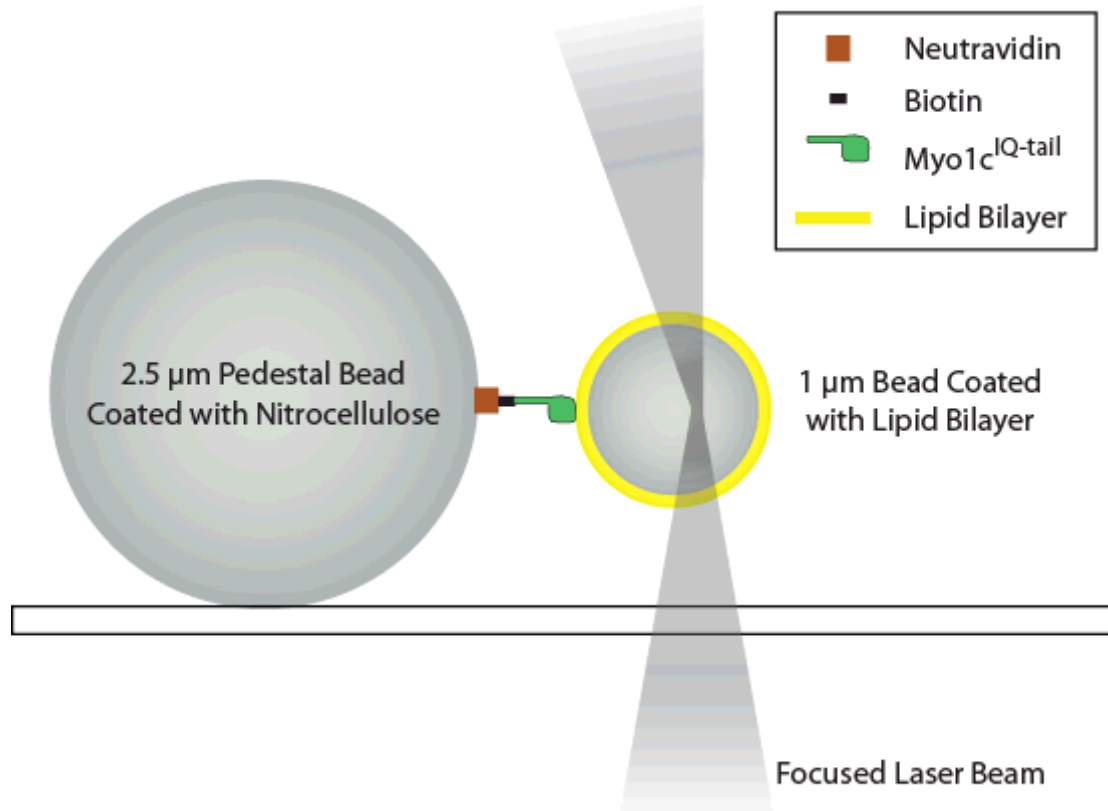

Figure S1.

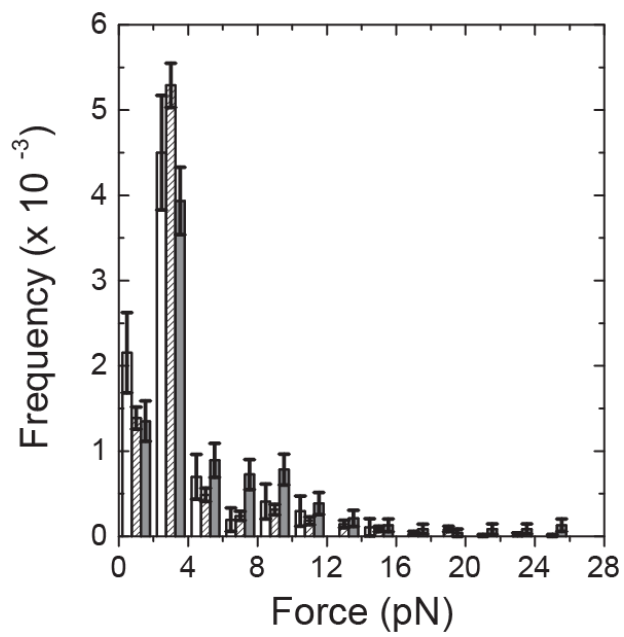

Figure S2.

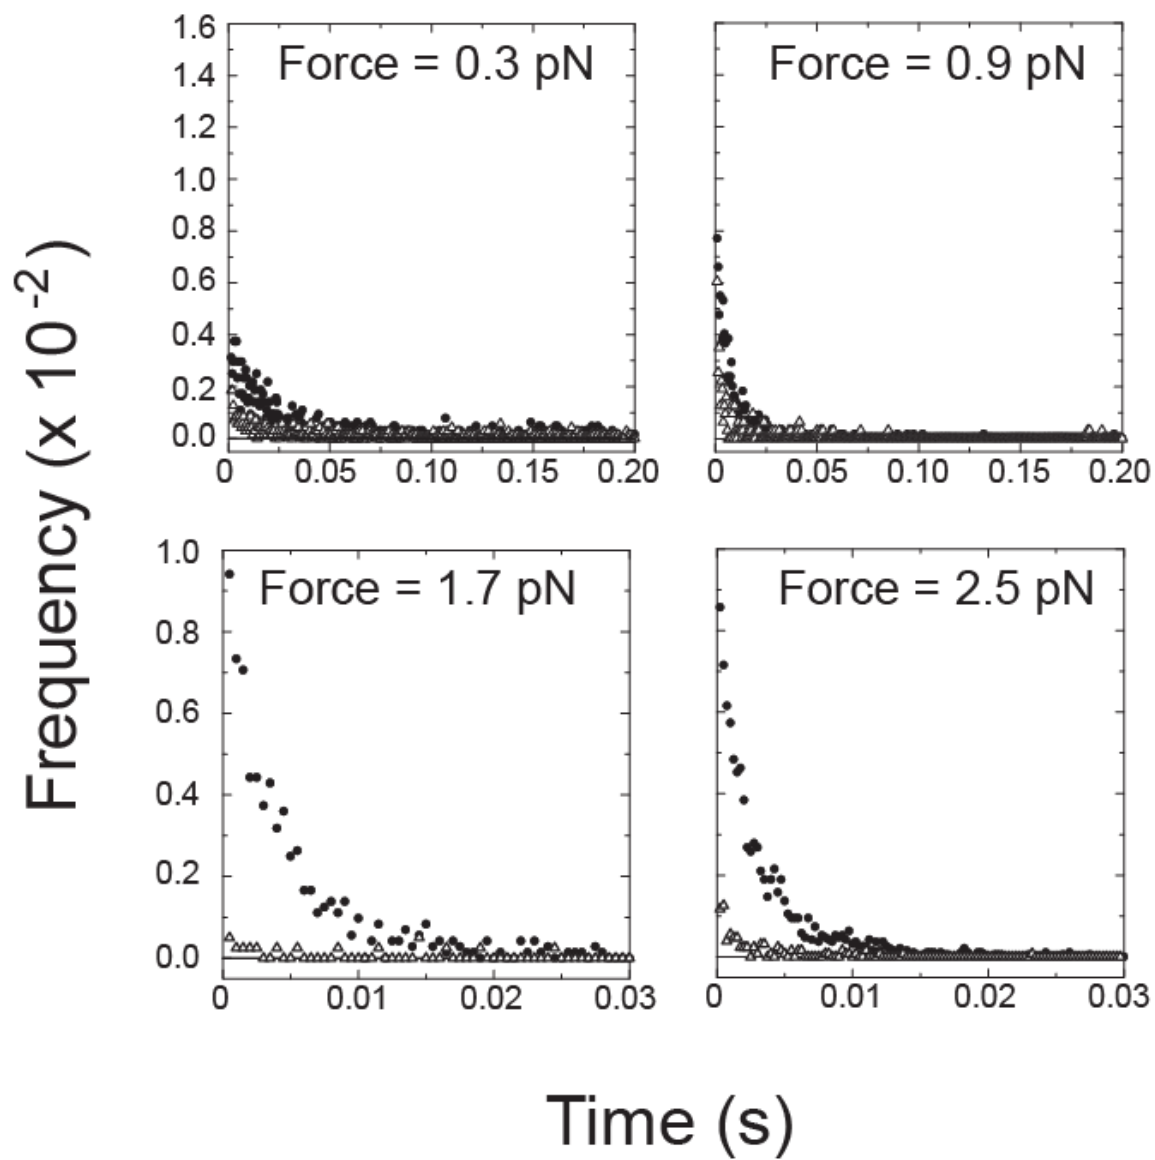

Figure S3.
